# Supplementary material for: Underdogs and One-Hit Wonders: When Is Overcoming Adversity Impressive?
Source: Atypon-hosted journal article supplement (doi:10.1287/mnsc.2022.4630), 2023-01-25
Supplement: mnsc.2022.4630.sm1.pdf [file mnsc.2022.4630.sm1.pdf]

## Appendix A

The probability that an agent who fails and then succeeds is of high quality is, using Bayes' rule,

$$Pr(H|F, S) = \frac{(1-p_h)p_{h,F}0.5}{(1-p_h)p_{h,F}0.5 + (1-p_l p_{l,F})0.5} = \frac{1}{1 + \frac{(1-p_l)p_{l,F}}{(1-p_h)p_{h,F}}},$$

which is a decreasing function of the ratio  $(1-p_l)p_{l,F}/((1-p_h)p_{h,F})$ . Similarly, the probability that an agent who succeeds and then fails is of high quality is

$$Pr(H|S, F) = \frac{p_h(1-p_{h,S})0.5}{p_h(1-p_{h,S})0.5 + p_l(1-p_{l,S})0.5} = \frac{1}{1 + \frac{p_l(1-p_{l,S})}{p_h(1-p_{h,S})}}.$$

$Pr(H|F, S)$  is larger than  $Pr(H|S, F)$  whenever

$$\frac{(1-p_l)p_{l,F}}{(1-p_h)p_{h,F}} < \frac{p_l(1-p_{l,S})}{p_h(1-p_{h,S})}, \implies \frac{(1-p_{h,S})p_h}{(1-p_{l,S})p_l} < \frac{p_{h,F}(1-p_h)}{p_{l,F}(1-p_l)}. \quad (\text{EC.1})$$

The probability that an agent who succeeds, and then succeeds again, is of high quality is

$$Pr(H|S, S) = \frac{p_h p_{h,S} 0.5}{p_h p_{h,S} 0.5 + p_l p_{l,S} 0.5} = \frac{1}{1 + \frac{p_l p_{l,S}}{p_h p_{h,S}}}.$$

Thus,  $Pr(H|F, S)$  is larger than  $Pr(H|S, S)$  whenever

$$\frac{(1-p_l)p_{l,F}}{(1-p_h)p_{h,F}} < \frac{p_l p_{l,S}}{p_h p_{h,S}} \implies \frac{p_{h,S} p_h}{p_{l,S} p_l} < \frac{p_{h,F}(1-p_h)}{p_{l,F}(1-p_l)}. \quad (\text{EC.2})$$

By symmetry, we have (using the second inequality in equation [EC.2](#)) that  $Pr(L|S, F)$  is larger than  $Pr(L|F, F)$  whenever

$$\frac{q_{l,F}}{q_{h,F}} \frac{q_l}{q_h} < \frac{q_{l,S}}{q_{h,S}} \frac{1-q_l}{1-q_h}. \quad (\text{EC.3})$$

## Appendix B

Suppose that failure decreases resources from  $r_2$  to  $r_1 < r_2$ , while success increases resources to  $r_3 > r_2$ . Using the first inequality in equation [EC.2](#),  $Pr(H|F, S)$  is larger than  $Pr(H|S, S)$  whenever

$$\frac{1-g(l, r_2)}{1-g(h, r_2)} \frac{g(l, r_1)}{g(h, r_1)} < \frac{g(l, r_2)}{g(h, r_2)} \frac{g(l, r_3)}{g(h, r_3)} \implies \frac{g(h, r_2)}{1-g(h, r_2)} \frac{g(l, r_1)}{g(h, r_1)} < \frac{g(l, r_2)}{1-g(l, r_2)} \frac{g(l, r_3)}{g(h, r_3)}. \quad (\text{EC.4})$$

Because  $g(h, r_2) > g(l, r_2)$  implies that  $g(h, r_2)/(1-g(h, r_2))$  is larger than  $g(l, r_2)/(1-g(l, r_2))$ , [EC.4](#) is only satisfied if  $\frac{g(l, r_3)}{g(h, r_3)} > \frac{g(l, r_1)}{g(h, r_1)}$ , i.e., if  $\frac{g(l, r_3)}{g(l, r_1)} > \frac{g(h, r_3)}{g(h, r_1)}$ , which is thus a necessary condition for  $Pr(H|F, S) > Pr(H|S, S)$ .
